# Supplementary figures and images for: Osteogenic and Protective Effects of Erucic Acid and Erucic Acid-Induced Exosomes against Fine Dust
Source: Preprints.org preprint supplement (doi:10.20944/preprints202405.0895.v1), 2024-05-13

Full gels

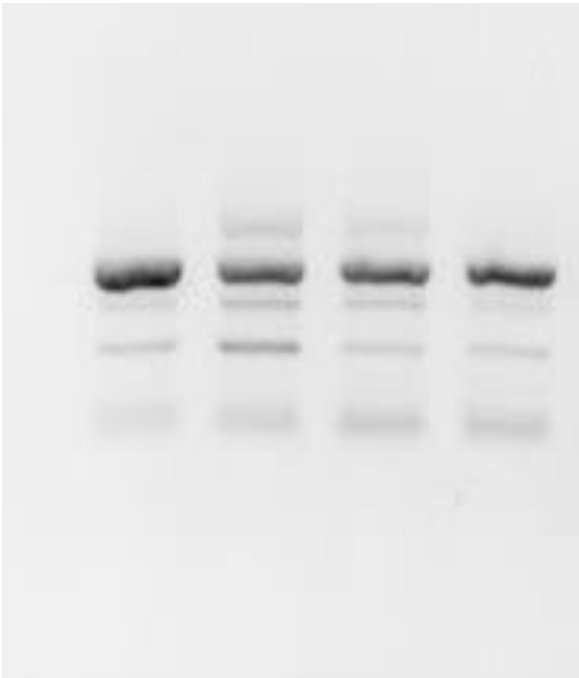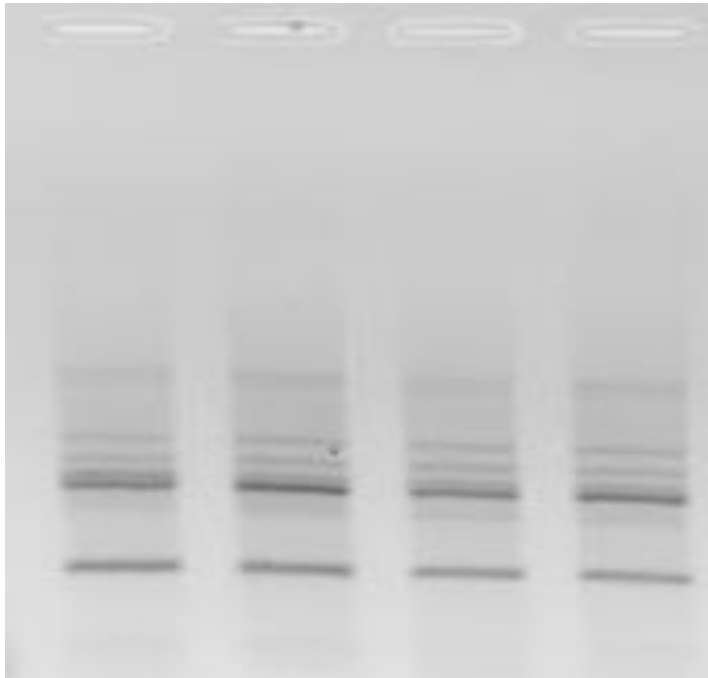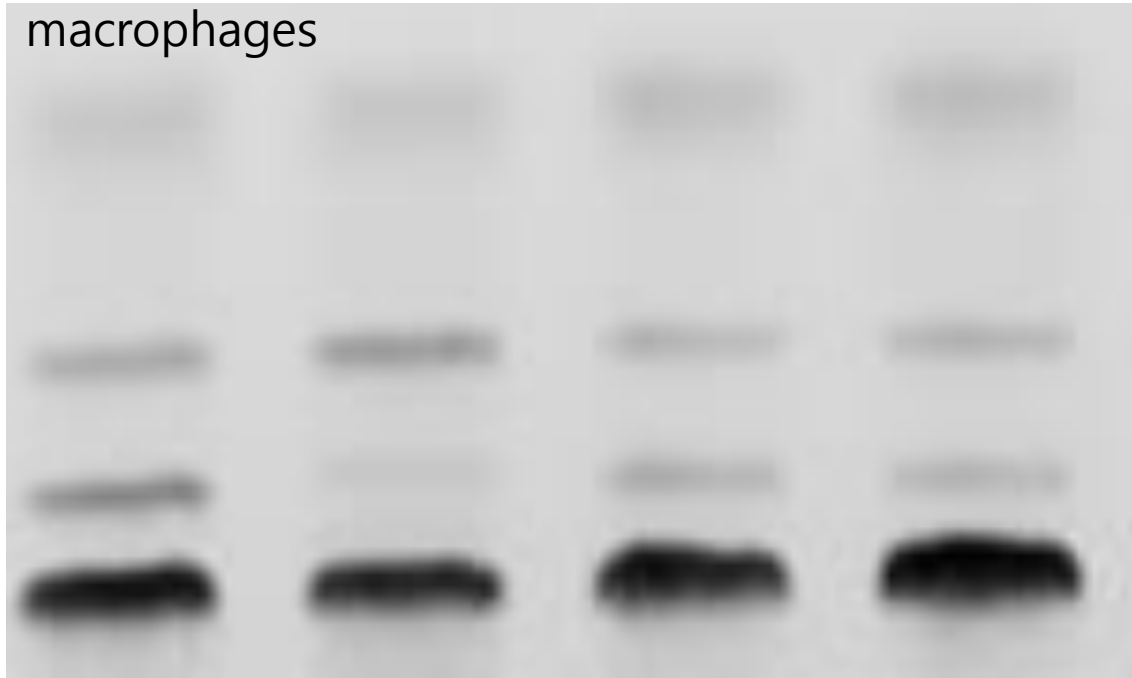

# Cellular viability Test

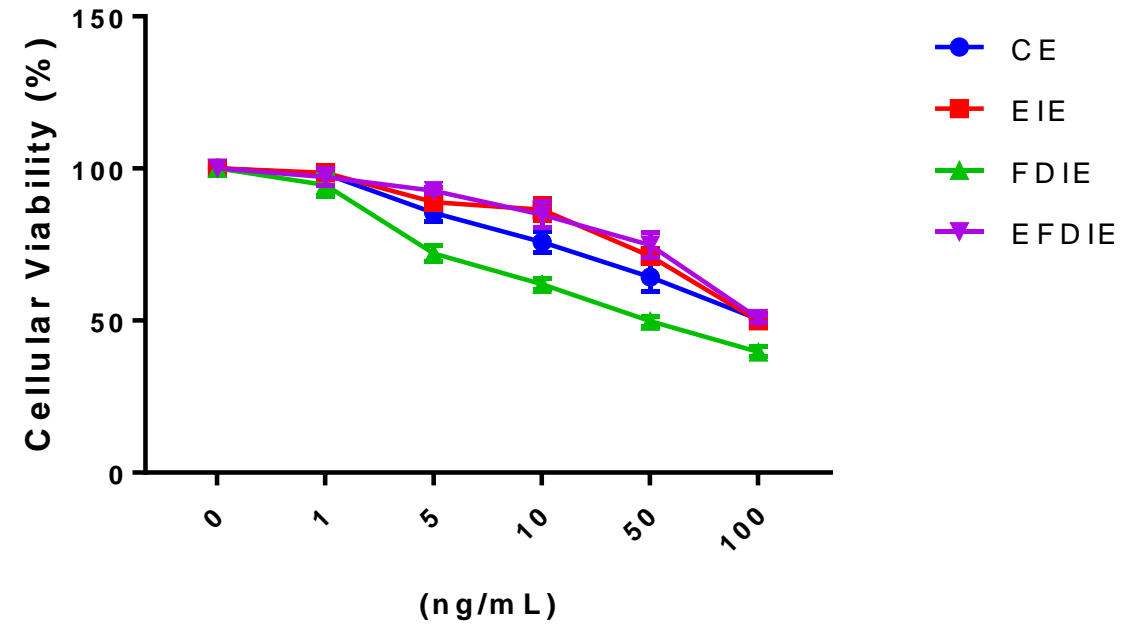

Supplement: Supplementary file 1 [file supplementary]
